# Supplementary material
Source: Research Square preprint supplement (doi:10.21203/rs.3.rs-9608519/v1)
Supplement: Supplementary file [file 2ed2c2d430296e304302e9bb.pdf]

1                   **Supplementary Information**  
2                   Reconsidering Brain Age: Why Age-Prediction  
3                   Models Fail as Measures of Brain Aging

4   **1 Data sources**

5   **1.1 ADNI**

6   The Alzheimer’s Disease Neuroimaging Initiative (ADNI) [1] is a multi-site project led  
7   by Doctor Michael W. Weiner to assess the progression of mild cognitive impairment  
8   (MCI) and early Alzheimer’s Disease (AD), combining imaging, clinical and other bio-  
9   logical markers, and neuropsychological and clinical assessments over time. For more  
10   information, visit <https://adni.loni.usc.edu/about/>. The age range for the participants  
11   is 55-90 years. In-detailed general inclusion and exclusion criteria are described else-  
12   where [2]. All participants signed an informed consent form and the protocols were  
13   approved by the corresponding regional ethical committees in the US and Canada.  
14   The present study includes participants from ADNI 1, ADNIGO, ADNI2, and ADNI  
15   3 with at least one tau PET scan.

16   **1.2 PreventAD**

17   The Pre-symptomatic Evaluation of Experimental or Novel Treatments for AD (Pre-  
18   ventAD) [3] is a retrospective, long-term study that follows cognitively healthy older  
19   individuals with a familiar history of AD. It includes participants enrolled either from  
20   an observational cohort or the clinical trial of PreventAD. This study comprises MRI  
21   images, blood and CSF samples, and clinical and neuropsychological assessments. Par-  
22   ticipants in the study had to be at least 60 years old, had  $\geq 6$  years of education,  
23   and they needed to be cognitively unimpaired at baseline. The Montreal Cognitive  
24   Assessment (MoCA) and CDR scales were used to assess cognitive abilities, and par-  
25   ticipants were considered cognitively intact if their MoCA scores were  $\geq 26/30$  or  
26   their CDR was = 0. Other exclusion criteria at baseline included medical conditions  
27   that prevented longitudinal participation or medical contraindications to MRI, use  
28   of acetylcholinesterase inhibitors, other approved prescription cognitive enhancers,  
29   hypertension, or substance abuse. The inclusion and exclusion criteria have been previ-  
30   ously described in detail [3]. The protocols, consent forms, and study procedures were  
31   approved by the McGill Institutional Review Board and the Douglas Mental Health  
32   University Institute Research Ethics Board. Observations with RBANS  $> 1SD$  below

33 the mean and probable MCI, as evaluated by a clinician, were excluded. The present  
34 study used data from all subjects with at least one tau PET scan.

### 35 **1.3 DLBS**

36 The Dallas Lifespan Brain Study (DLBS) [4] is a longitudinal, multi-modal neuroimag-  
37 ing study of the aging mind initiated in 2008. Participants returned for two additional  
38 waves of data collection, with an approximate interval of 4–5 years between waves.  
39 The DLBS includes structural MRI, diffusion MRI, functional MRI, amyloid PET,  
40 tau PET, comprehensive cognitive assessments, and psychosocial measures. The study  
41 was designed to investigate brain aging, Alzheimer’s disease-related PET biomarkers,  
42 and cognition across the adult lifespan, with participants ranging from 20–90 years of  
43 age. It was also among the earlier cognitive aging studies to include in vivo measure-  
44 ment of tauopathy using PET imaging with the radiotracer AV-1451, also known as  
45 flortaucipir.

46 Participants were recruited in two cohorts with partly different inclusion and exclu-  
47 sion criteria. In the first cohort, participants were required to be right-handed, fluent in  
48 English, between 20 and 89 years old at Wave 1, have at least a 10th grade education,  
49 and have a Mini-Mental State Examination (MMSE) score  $\geq 26$ . Exclusion criteria  
50 included major psychiatric or neurological disorders, recent chemotherapy, coronary  
51 bypass, history of substance abuse, central nervous system disease or brain injury,  
52 immune, kidney, liver, or pulmonary disorders, corrected vision poorer than 20/30,  
53 insulin-dependent diabetes, use of sedatives, benzodiazepines, or anti-psychotics, high  
54 caffeine consumption, high cholesterol, blood pressure above 160/90, BMI  $\geq 35$ , recent  
55 recreational drug use, or contraindications to MRI. The second cohort included par-  
56 ticipants aged 50–89 years at Wave 1 who were enrolled in the Amyloid PET Scan  
57 Study, were right-handed, fluent in English, had at least a 9th grade education, and  
58 met additional education and health-related criteria. At Waves 2 and 3, participants  
59 were required to complete testing within a re-test interval of 2.5–11 years, and the  
60 MMSE exclusion cutoff was lowered to  $< 22$  to allow potential cognitive decline to be  
61 captured.

62 Tau PET imaging at Waves 2 and 3 used  $^{18}\text{F}$ -AV-1451, also known as flortaucipir.

### 63 **1.4 HABS**

64 The Harvard Aging Brain Study (HABS) [5] is an ongoing, long-term observational  
65 study that aims to enhance our understanding of brain aging and the early stages  
66 of Alzheimer’s disease. The study collects PET, MRI data, neuropsychological and  
67 clinical assessments. The age range was between 50 and 90 years at the time of baseline  
68 assessment and all patients were considered non-clinically impaired at the start of  
69 the study. Further participants had a CDR score of 0, MMSE score  $\geq 25$ ,  $< 11$  on  
70 the Geriatric Depression Scale, and scores above age- and education-adjusted cutoffs  
71 on the 30-Minute Delayed Recall of the Logical Memory Story A to be included in  
72 the study. Participants with a history of alcoholism, drug abuse, head trauma, or  
73 current serious medical/psychiatric illness were excluded. Further details can be found  
74 elsewhere [5]. All participants signed an informed consent form and the protocol was

75 approved by the Partners Healthcare Human Research Committee. The present study  
76 used data from all subjects with at least one tau PET scan. We used data from HABS  
77 data release 2.20, retrieved in August 2022 via <https://habs.mgh.harvard.edu/>.

## 78 1.5 UKB

79 The UK Biobank (UKB) (<https://www.ukbiobank.ac.uk/about-biobank-uk/>) is a  
80 major national and international health resource with the aim of improving the pre-  
81 vention, diagnosis and treatment of a wide range of illnesses. UK Biobank recruited  
82  $\approx 500,000$  people aged between 40-69 years in 2006-2010 from across the country to  
83 take part in this project (Guggenheim et al., 2015). Potential participants were iden-  
84 tified through National Health Service (NHS) registers according to being aged 40-69  
85 and living within a reasonable traveling distance of an assessment center. Assessment  
86 centers are located in accessible and convenient locations with a large surrounding  
87 population. Participants have undergone measures and provided samples and detailed  
88 information about themselves and agreed to have their health followed. The study sam-  
89 ple was drawn from the UK Biobank neuroimaging branch [6] and conducted under  
90 data application number 32048. Only individuals with longitudinal MRI data were  
91 used in this study. The subsample used in this study consists of the participants in the  
92 first wave of longitudinal imaging. Participants signed an informed consent and the  
93 protocols were approved by the North West Multi-Center Research Ethics Committee  
94 [MREC]; see also <https://www.ukbiobank.ac.uk/the-ethics-and-governance-council>.

## 95 1.6 LCBC

96 The Center for Lifespan Changes in Brain and Cognition cohort (LCBC, Oslo) [7]  
97 consists of cognitively healthy, community-dwelling participants across the lifespan  
98 and is drawn from studies coordinated by the LCBC Research Group (LCBC [www.oslobrains.no](http://www.oslobrains.no)), approved by a Norwegian Regional Committee for Medical and Health  
99 Research Ethics. Written informed consent was obtained from all participants. The  
100 samples were recruited by a variety of methods such as newspapers and webpage ads.  
101 Most participants were recruited for observational studies, some currently ongoing,  
102 while a minority were recruited to enter into cognitive training. Written informed  
103 consent was obtained from all adult participants. All participants had to undergo a  
104 standardized health interview before being included in the study, and those with a  
105 history of neurological or psychiatric conditions or who reported concerns about their  
106 cognitive function were excluded. Additionally, all participants over the age of 40 years  
107 were required to score at least 25 on the Mini-Mental State Examination. The LCBC  
108 cohort was part of the Lifebrain obtained as part of the Lifebrain consortium [8].  
109

**Table 1:** MRI-derived features used in the brain age models. Corresponding right- and left-hemisphere features were combined by summation prior to modelling.

| <b>Region / structure</b> | <b>Area</b> | <b>Thickness</b> | <b>Volume</b> |
|---------------------------|-------------|------------------|---------------|
| bankssts                  | ✓           | ✓                | ✓             |
| caudalanteriorcingulate   | ✓           | ✓                | ✓             |
| caudalmiddlefrontal       | ✓           | ✓                | ✓             |
| cuneus                    | ✓           | ✓                | ✓             |
| entorhinal                | ✓           | ✓                | ✓             |
| frontalpole               | ✓           | ✓                | ✓             |
| fusiform                  | ✓           | ✓                | ✓             |
| inferiorparietal          | ✓           | ✓                | ✓             |
| inferiortemporal          | ✓           | ✓                | ✓             |
| insula                    | ✓           | ✓                | ✓             |
| isthmuscingulate          | ✓           | ✓                | ✓             |
| lateraloccipital          | ✓           | ✓                | ✓             |
| lateralorbitofrontal      | ✓           | ✓                | ✓             |
| lingual                   | ✓           | ✓                | ✓             |
| medialorbitofrontal       | ✓           | ✓                | ✓             |
| middletemporal            | ✓           | ✓                | ✓             |
| paracentral               | ✓           | ✓                | ✓             |
| parahippocampal           | ✓           | ✓                | ✓             |
| parsopercularis           | ✓           | ✓                | ✓             |
| parsorbitalis             | ✓           | ✓                | ✓             |
| parstriangularis          | ✓           | ✓                | ✓             |
| pericalcarine             | ✓           | ✓                | ✓             |
| postcentral               | ✓           | ✓                | ✓             |
| posteriorcingulate        | ✓           | ✓                | ✓             |
| precentral                | ✓           | ✓                | ✓             |
| precuneus                 | ✓           | ✓                | ✓             |
| rostralanteriorcingulate  | ✓           | ✓                | ✓             |
| rostralmiddlefrontal      | ✓           | ✓                | ✓             |
| superiorfrontal           | ✓           | ✓                | ✓             |
| superiorparietal          | ✓           | ✓                | ✓             |
| superiortemporal          | ✓           | ✓                | ✓             |
| supramarginal             | ✓           | ✓                | ✓             |
| transversetemporal        | ✓           | ✓                | ✓             |
| Accumbens-area            | ✓           |                  |               |
| Lateral-Ventricle         |             |                  | ✓             |
| Inf-Lat-Vent              |             |                  | ✓             |
| Cerebellum-White-Matter   |             |                  | ✓             |
| Cerebellum-Cortex         |             |                  | ✓             |

*Continued on next page*

| Region / structure            | Area | Thickness | Volume |
|-------------------------------|------|-----------|--------|
| Thalamus-Proper               |      |           | ✓      |
| Caudate                       |      |           | ✓      |
| Putamen                       |      |           | ✓      |
| Pallidum                      |      |           | ✓      |
| 3rd-Ventricle                 |      |           | ✓      |
| 4th-Ventricle                 |      |           | ✓      |
| Brain-Stem                    |      |           | ✓      |
| Hippocampus                   |      |           | ✓      |
| Amygdala                      |      |           | ✓      |
| CSF                           |      |           | ✓      |
| VentralDC                     |      |           | ✓      |
| vessel                        |      |           | ✓      |
| choroid-plexus                |      |           | ✓      |
| SubCortGrayVol                |      |           | ✓      |
| TotalGrayVol                  |      |           | ✓      |
| SupraTentorialVol             |      |           | ✓      |
| EstimatedTotalIntraCranialVol |      |           | ✓      |

## 110 2 Method details of empirical demonstration

111 Here, we provide a more detailed description of the empirical demonstration. This  
112 analysis is intended as a proof of concept, showing the consequences of using brain  
113 age models to quantify accelerated ageing. It is not intended as a reference analysis of  
114 the associations between birth weight or tau levels and brain measures.

### 115 2.1 MRI

116 Structural MRI data were obtained from ADNI, DLBS, HABS, Prevent-AD, LCBC,  
117 and UK Biobank (UKB). All MRI data, except UKB data, were processed on a local  
118 secure server using the longitudinal stream of FreeSurfer v7.1.0 to extract measures  
119 of cortical area, cortical thickness, cortical volume, and subcortical/global volume.  
120 The preprocessing of the UKB sample is given in detail in the UKB documentation:  
121 [https://biobank.ndph.ox.ac.uk/ukb/ukb/docs/brain\\_mri.pdf](https://biobank.ndph.ox.ac.uk/ukb/ukb/docs/brain_mri.pdf). Subjects younger than  
122 50 years and older than 90 years were excluded from the analysis.

123 To reduce collinearity between hemispheric features, corresponding features from  
124 the right and left hemispheres were combined prior to modelling. The complete set of  
125 MRI-derived features used in the brain age models is listed in Supplementary Table 1.

126 We estimated imaging-site effects using a linear model in `statsmodels` with the  
127 following formula:

128 `feature ~ cr(age, df=5) + C(site) + ICV`

129 where `feature` denotes the MRI-derived feature being corrected, `cr(age, df=5)`  
130 denotes a cubic regression spline for age with 5 degrees of freedom, `site` denotes

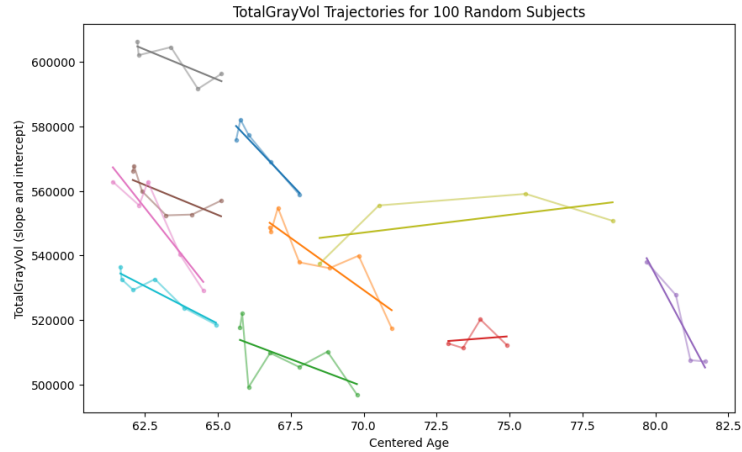

**Fig. 1** Examples of longitudinal grey matter volume trajectories used to estimate subject-specific slopes.

131 imaging site, and ICV denotes intracranial volume. The estimated site effect was then  
 132 subtracted from each session. This procedure corrected imaging features for site effects  
 133 while accounting for non-linear age-related variation.

134 To obtain longitudinal estimates of change, a linear model was fitted separately  
 135 for each subject using the site-corrected sessions, providing a slope and intercept for  
 136 each subject. The slope was used in the longitudinal analyses. Examples are shown in  
 137 Supplementary Fig. 1. The upper and lower 0.1% of the feature values and the upper  
 138 and lower 1% of the slopes were clipped to reduce the influence of outliers. All features  
 139 were z-scored after outlier clipping.

140 For cross-sectional analyses, one session per participant was selected as the session  
 141 closest to the participant’s mean age across visits. This reduces regression-to-the-mean  
 142 effects when cross-sectional measures are analysed together with longitudinal slope  
 143 estimates.

## 144 2.2 Brain age models

145 Brain age prediction models were trained on cross-sectional data from UK Biobank.  
 146 In total, 42,590 UKB participants were used for model training and evaluation. We  
 147 trained both an Elastic Net regression model and a non-linear XGBoost model to  
 148 predict chronological age from the MRI-derived features.

149 The UKB data were divided into five folds. For each split, three folds were used for  
 150 training, one fold for validation, and one fold for testing. Hyperparameter tuning was  
 151 performed on the validation set of the first training-validation-test split, and the same  
 152 hyperparameters were then used for the remaining training-validation-test splits. By  
 153 rotating which fold was used as the test fold, we obtained out-of-sample brain age  
 154 estimates for all UKB participants without data leakage. For the non-UKB datasets,  
 155 an ensemble of the UKB-trained brain age models was used.

156 For the Elastic Net model, the hyperparameter search was performed over a grid  
 157 of alpha values ranging from  $10^{-8}$  to  $10^{-3}$  with 10 steps, and l1-ratio values ranging  
 158 from 0 to 1 with 20 steps.

159 For the XGBoost model, the hyperparameter search was performed over the  
 160 following grid:

```
161 n_estimators_hyperparams = [100, 300, 600, 1000]
162 max_depth_hyperparams = [3, 5, 7]
163 learning_rate_hyperparams = [0.01, 0.1, 0.2]
```

164 Because brain age predictions typically show systematic age-dependent bias [9],  
 165 predicted ages were corrected using a Gaussian kernel approach. Specifically, the  
 166 expected brain-age prediction given chronological age was estimated in the training  
 167 data as:

$$E[m(\mathbf{X}(t)) | t] \approx \frac{\sum_i m(\mathbf{x}_i) \exp\left(-\frac{1}{2} \left(\frac{t_i - t}{\sigma_k}\right)^2\right)}{\sum_i \exp\left(-\frac{1}{2} \left(\frac{t_i - t}{\sigma_k}\right)^2\right)}, \quad (1)$$

168 where  $m$  is the brain age model,  $\mathbf{x}_i$  denotes the features from session  $i$ ,  $t_i$  is the  
 169 chronological age at that session,  $\sigma_k$  is the kernel spread, and  $t$  is the central chrono-  
 170 logical age. We used a Gaussian kernel with standard deviation  $\sigma_k = 2$  years. Brain  
 171 age predictions were then bias-corrected by subtracting this estimated expected pre-  
 172 diction. The brain age gap was computed as the difference between the bias-corrected  
 173 predicted age and chronological age.

174 For comparison with simpler structural MRI measures, we selected hippocampal  
 175 volume, total grey matter volume, and the longitudinal slope of each measure for each  
 176 participant.

### 177 2.3 Birth weight association

178 We used self-reported birth weight measures from UK Biobank and registry-based  
 179 birth weight data from LCBC. Outliers were removed by excluding birth weights above  
 180 6 kg and below 1 kg.

181 We tested whether birth weight was associated with brain age gap or volumetric  
 182 measures. Birth weight is fixed at birth and therefore cannot itself change with age.  
 183 Thus, an association between birth weight and brain age gap would be interpreted as  
 184 a test of whether brain age models misclassify stable individual differences in brain  
 185 structure as differences in brain aging.

186 To estimate the relationship between birth weight and brain age gap, separate  
 187 models were fitted for the Elastic Net and XGBoost brain age gaps using the following  
 188 formula:

```
189 bw ~ bs(age, df=5) + brain_age_gap + C(site) + C(sex_female)
```

190 where `brain_age_gap` denotes the brain age gap estimate from either the Elastic Net  
 191 or XGBoost model.

192 To estimate the relationship between birth weight and structural MRI measures,  
193 separate models were fitted using the following formula:

```
194 bw ~ bs(age, df=5) + vol_meas + C(site) + C(sex_female)
```

195 where `vol_meas` denotes the volumetric measure of interest.

196 Because longitudinal measurements are noisy over short time intervals, we used a  
197 estimate of measurement noise for each subject based on the time interval between the  
198 first and last session. Assuming that imaging sessions are approximately equally spaced  
199 over the observation period, the measurement noise is approximately proportional to  
200 the inverse squared observation time [10]:

$$\text{Var}[\alpha] \propto \frac{1}{\Delta t^2}. \quad (2)$$

201 For the longitudinal association analyses, we therefore weighted each subject by the  
202 squared total observation time. This ensures that slope estimates derived from longer  
203 observation windows contribute proportionally more to the regression estimates. This  
204 approach is broadly similar to excluding subjects with very short observation periods,  
205 but allows all available data to contribute to the analysis.

## 206 2.4 Tau PET association

207 Estimated tau levels from PET were obtained from ADNI, Prevent-AD, DLBS, and  
208 HABS. We did not process the PET scans ourselves, but used the estimated values as  
209 provided by each contributing source. For some datasets, the temporal overlap between  
210 brain MRI and PET was limited, as shown in Supplementary Fig. 2.

211 Tau levels increase relatively predictably over time, making it possible to estimate  
212 tau levels at the time of MRI scanning. Since not all PET scans were acquired at the  
213 same visit as the structural MRI scans, we used Sample Iterative Local Approximation  
214 modelling, as described by [11], to estimate tau PET levels at each MRI scan time.

215 For each MRI session, tau positivity was defined using a threshold of 1.11 stan-  
216 dardized uptake value ratio (SUVR) [12]. The same threshold was used across all  
217 cohorts.

218 Logistic regression was used to estimate the association between tau PET positivity  
219 and brain age or volumetric measures.

220 Tau accumulation is a hallmark biomarker of late-life neurodegenerative disease  
221 and reflects an age-related process. The tau PET analyses were therefore used to test  
222 whether brain age models were sensitive to individually varying age-related change. We  
223 compared the sensitivity of brain age gap with the sensitivity of the simpler volumetric  
224 measures.

225 For the association between tau positivity and brain age gap, separate logistic  
226 regression models were fitted for the Elastic Net and XGBoost brain age gaps using  
227 the following formula:

```
228 tau_pos ~ bs(age, df=3) + brain_age_gap + C(site) + C(sex_female)
```

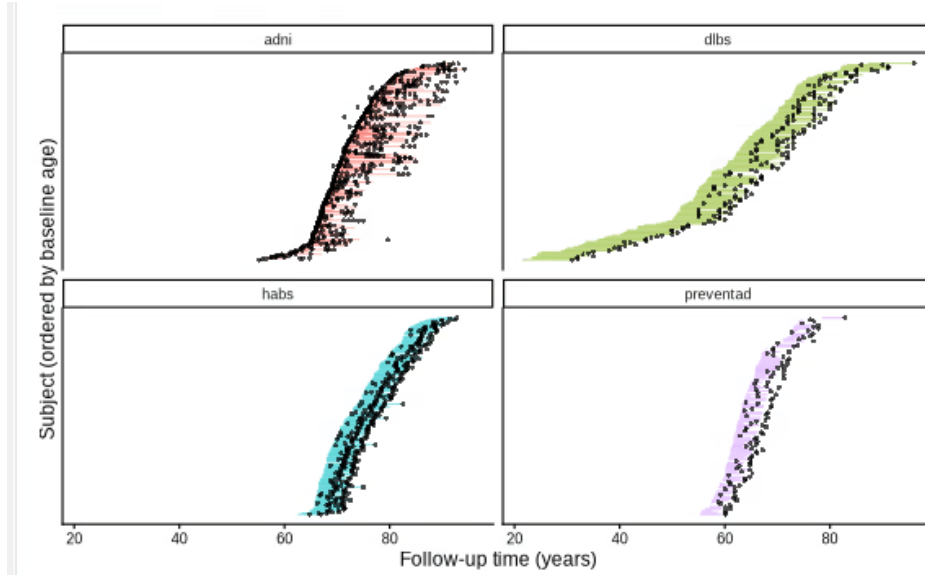

**Fig. 2** PET and MRI scans for the contributing datasets. Black dots indicate PET scans, while coloured dots indicate MRI scans.

229 For the association between tau positivity and volumetric measures, separate  
 230 logistic regression models were fitted using the following formula:

231 
$$\text{tau\_pos} \sim \text{bs}(\text{age}, \text{df}=3) + \text{vol\_meas} + \text{C}(\text{site}) + \text{C}(\text{sex\_female}) + \text{ICV}$$

232 where `vol_meas` denotes the volumetric measure of interest. For the volumetric mea-  
 233 sures, the sign was flipped where necessary so that higher values consistently reflected a  
 234 more adverse brain phenotype and therefore higher expected risk of tau PET positivity.

235 Similar to the birth weight analysis, longitudinal measures were weighted by the  
 236 squared total observation time.

237 To compare Elastic Net brain age gap with selected volumetric measures directly,  
 238 both predictors were included in the same logistic regression model. The volumet-  
 239 ric measures tested were hippocampal volume, hippocampal volume change, total  
 240 grey matter volume, and total grey matter volume change. For each comparison, the  
 241 following logistic regression model was fitted:

242 
$$\text{tau\_pos} \sim \text{age} + \text{vol\_meas} + \text{elastic\_net\_gap}$$
  
 243 
$$+ \text{C}(\text{site}) + \text{C}(\text{sex\_female}) + \text{ICV}$$

244 where `vol_meas` denotes the volumetric measure being compared with Elastic Net  
 245 brain age gap. For longitudinal volumetric measures, observations were weighted by  
 246 the squared total observation time. Age, the volumetric measure, and Elastic Net brain  
 247 age gap were standardized before model fitting. Two-sided Wald tests were then used

248 to test whether the coefficient for the volumetric measure differed from the coefficient  
249 for Elastic Net brain age gap.

## 250 **2.5 Acknowledgements to data provides**

251 Parts of the data collection and sharing for this project was funded by the Alzheimer’s  
252 Disease Neuroimaging Initiative (ADNI) (National Institutes of Health Grant U01  
253 AG024904) and DOD ADNI (Department of Defense award number W81XWH-12-2-  
254 0012). ADNI is funded by the National Institute on Aging, the National Institute of  
255 Biomedical Imaging and Bioengineering, and through generous contributions from the  
256 following: AbbVie, Alzheimer’s Association; Alzheimer’s Drug Discovery Foundation;  
257 Araclon Biotech; BioClinica, Inc.; Biogen; Bristol-Myers Squibb Company; CereSpir,  
258 Inc.; Cogstate; Eisai Inc.; Elan Pharmaceuticals, Inc.; Eli Lilly and Company; EuroIm-  
259 mun; F. Hoffmann-La Roche Ltd and its affiliated company Genentech, Inc.; Fujirebio;  
260 GE Healthcare; IXICO Ltd.; Janssen Alzheimer Immunotherapy Research & Devel-  
261 opment, LLC.; Johnson & Johnson Pharmaceutical Research & Development LLC.;  
262 Lumosity; Lundbeck; Merck & Co., Inc.; Meso Scale Diagnostics, LLC.; NeuroRx  
263 Research; Neurotrack Technologies; Novartis Pharmaceuticals Corporation; Pfizer  
264 Inc.; Piramal Imaging; Servier; Takeda Pharmaceutical Company; and Transition  
265 Therapeutics. The Canadian Institutes of Health Research is providing funds to sup-  
266 port ADNI clinical sites in Canada. Private sector contributions are facilitated by the  
267 Foundation for the National Institutes of Health ([www.fnih.org](http://www.fnih.org)). The grantee organi-  
268 zation is the Northern California Institute for Research and Education, and the study  
269 is coordinated by the Alzheimer’s Therapeutic Research Institute at the University  
270 of Southern California. ADNI data are disseminated by the Laboratory for Neuro  
271 Imaging at the University of Southern California.

272 UK Biobank is generously supported by its founding funders the Wellcome Trust  
273 and UK Medical Research Council, as well as the Department of Health, Scottish  
274 Government, the Northwest Regional Development Agency, British Heart Foundation  
275 and Cancer Research UK. The organisation has over 150 dedicated members of staff,  
276 based in multiple locations across the UK.

277 Parts of the data used in preparation of this article were obtained from the Pre-  
278 Symptomatic Evaluation of Novel or Experimental Treatments for Alzheimer’s Disease  
279 (Prevent AD) program.

280 Data used in the preparation of this article were also obtained in part from the  
281 Harvard Aging Brain Study (HABS - P01AG036694; <https://habs.mgh.harvard.edu>).  
282 The HABS study was launched in 2010, funded by the National Institute on Aging.  
283 and is led by principal investigators Reisa A. Sperling MD and Keith A. Johnson MD  
284 at Massachusetts General Hospital/Harvard Medical School in Boston, MA.

## 285 References

- 286 [1] Mueller, S. G. *et al.* The Alzheimer’s disease neuroimaging initiative. *Neuroimag-*  
287 *ing Clinics* **15**, 869–877 (2005).
- 288 [2] Petersen, R. *et al.* Alzheimer’s disease Neuroimaging Initiative (ADNI) clinical  
289 characterization. *Neurology* **74**, 201–209 (2010).
- 290 [3] Tremblay-Mercier, J. *et al.* Open science datasets from PREVENT-AD, a lon-  
291 gitudinal cohort of pre-symptomatic Alzheimer’s disease. *NeuroImage: Clinical*  
292 **31**, 102733 (2021).
- 293 [4] Park, D. *et al.* The dallas lifespan brain study: A comprehensive adult lifespan  
294 data set of brain and cognitive aging. *Scientific Data* **12** (2025).
- 295 [5] Dagley, A. *et al.* Harvard aging brain study: dataset and accessibility. *NeuroImage*  
296 **144**, 255–258 (2017).
- 297 [6] Miller, K. *et al.* Multimodal population brain imaging in the UK Biobank  
298 prospective epidemiological study. *Nature Neuroscience* **19**, 1523–1536 (2016).
- 299 [7] Walhovd, K. *et al.* Neurodevelopmental origins of lifespan changes in brain and  
300 cognition. *Proceedings of the National Academy of Sciences* **113**, 9357–9362  
301 (2016).
- 302 [8] Walhovd, K. B. *et al.* Healthy minds 0–100 years: Optimising the use of european  
303 brain imaging cohorts (“lifebrain”). *European Psychiatry* **50**, 47–56 (2018).
- 304 [9] Smith, S. M., Vidaurre, D., Alfaro-Almagro, F., Nichols, T. E. & Miller, K. L.  
305 Estimation of brain age delta from brain imaging. *Neuroimage* **200**, 528–539  
306 (2019).
- 307 [10] Grødem, E. O. *et al.* Stable individual differences dominate adult brain volume  
308 variation until later life. *Imaging Neuroscience* (2026).
- 309 [11] Betthausen, T. J. *et al.* Multi-method investigation of factors influencing amyloid  
310 onset and impairment in three cohorts. *Brain* **145**, 4065–4079 (2022). URL  
311 <https://doi.org/10.1093/brain/awac213>.
- 312 [12] Maass, A. *et al.* Comparison of multiple tau-PET measures as biomarkers in  
313 aging and Alzheimer’s disease. *NeuroImage* **157**, 448–463 (2017).
